# Supplementary material for: Presence of Calcium Lowers the Expansion of Bacillus subtilis Colony Biofilms
Source: PubMed Central journal article supplement (PMC5374384; doi:10.3390/microorganisms5010007), 2017-02-16
Supplement: microorganisms-05-00007-s001.pdf [file microorganisms-05-00007-s001.pdf]

## Presence of Calcium Lowers the Expansion of *Bacillus subtilis* Colony Biofilms

Eisha Mhatre <sup>1</sup>, Anandaroopan Sundaram <sup>1</sup>, Theresa Hölscher <sup>1</sup>, Mike Mühlstädt <sup>2</sup>, Jörg Bossert <sup>2</sup>, Ákos T. Kovács <sup>1,\*</sup>

<sup>1</sup> Terrestrial Biofilms Group, Institute of Microbiology, Friedrich Schiller University Jena, 07743 Jena, Germany; eisha.r.mhatre@gmail.com (E.M.); sundar.sabitha@gmail.com (A.S.); thoelscher@ice.mpg.de (T.H.),

<sup>2</sup> Otto Schott Institute of Materials Research, Friedrich Schiller University Jena, 07743 Jena, Germany; mike.muehlstaedt@uni-jena.de (M.M.); Joerg.Bossert@uni-jena.de (J.B.)

\* Correspondence: akos-tibor.kovacs@uni-jena.de

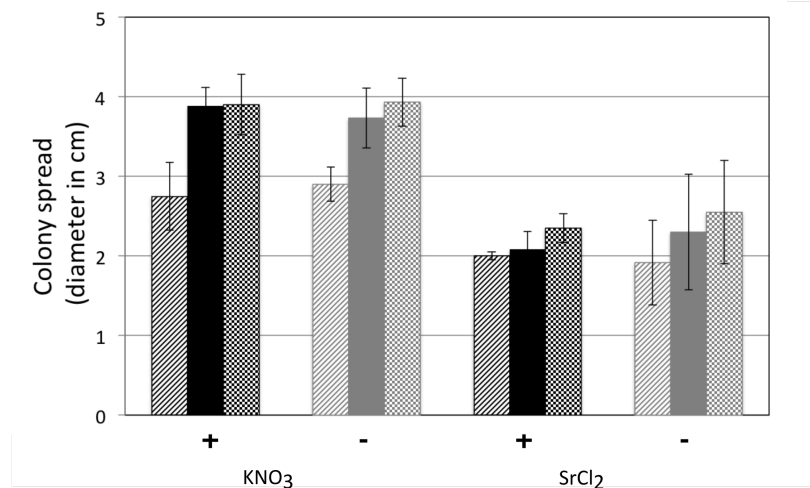

**Figure S1. Ca<sup>2+</sup> specifically reduce colony escape.** The colony expansion diameters of *B. subtilis* DK1042 are shown after 3 (striped), 5 (filled), and 7 (checked) days. Black bars present data in presence, while grey bars indicate in absence of KNO<sub>3</sub> and SrCl<sub>2</sub> in the 2×SG medium. KNO<sub>3</sub> was used to observe the impact of NO<sub>3</sub><sup>-</sup>, while SrCl<sub>2</sub> was applied to assay the influence of another divalent cation. The error bars indicate 95% confidence intervals.

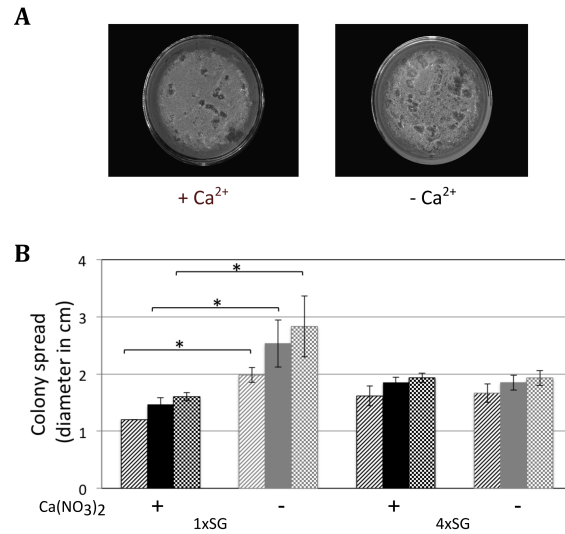

**Figure S2. Impact of Ca<sup>2+</sup> on pellicle formation and colony spreading at different nutrient concentrations.** (A) Pellicle formation of *B. subtilis* DK1042 on 2×SG medium in the presence (left) and absence (right) of Ca<sup>2+</sup> supplementation after 3 days. (B) The colony expansion diameters of the *B. subtilis* DK1042 are shown on 1×SG and 4×SG media with 1.5% agar after 3 (striped), 5 (filled), and 7 (checked) days. The black bars present data in presence, while grey bars indicate in absence of Ca<sup>2+</sup> supplementation in the media. The error bars indicate 95% confidence intervals. \* denotes significant differences (p<0.05) analyzed with paired t-test.

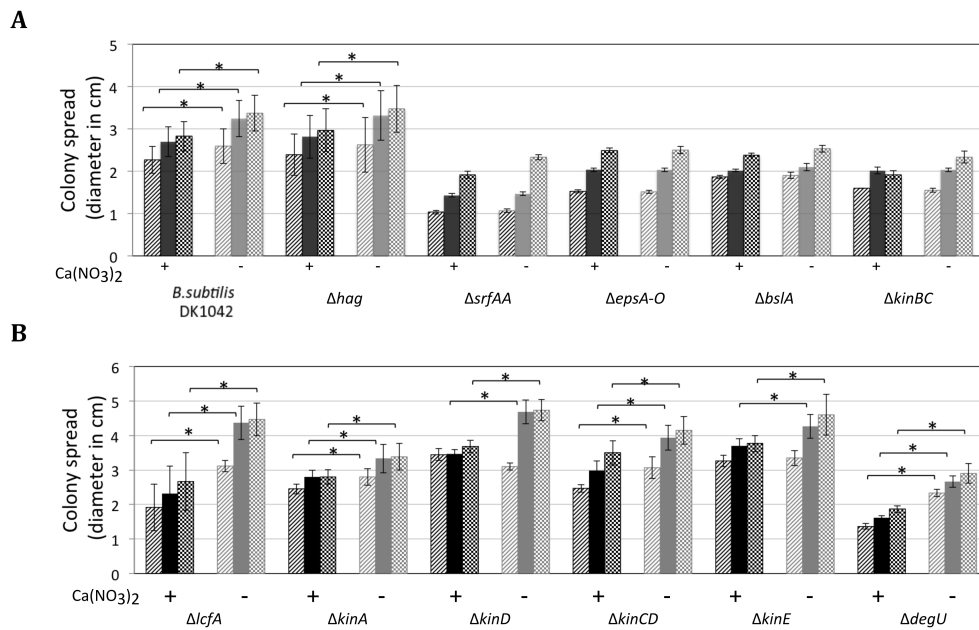

**Figure S3. Colony escape of various strains on MSgg (A) and 2×SG (B) medium.** (A) The colony expansion diameters of the *B. subtilis* DK1042 and its derivatives, Δ*hag*, Δ*srfAA*, Δ*epsA-O*, Δ*bslA*, and Δ*kinB*Δ*kinC* are shown on MSgg medium after 4 (striped), 6 (filled), and 8 (checked) days. (B) The colony expansion diameters of the *B. subtilis* Δ*lcfA*, Δ*kinA*, Δ*kinB*, Δ*kinC*, Δ*kinD*, Δ*kinE*, Δ*kinC*Δ*kinD*, and Δ*degU* are shown on 2×SG medium after 3 (striped), 5 (filled), and 7 (checked) days. Black bars present data in presence, while grey bars indicate in absence of Ca<sup>2+</sup> supplementation in the respective media in both panels. The error bars indicate 95% confidence intervals. \* denotes significant differences (p<0.05) analyzed with paired t-test.
